# Supplementary material
Source: PubMed Central journal article supplement (PMC9352834)
Supplement: 12264_2022_888_MOESM1_ESM.pdf [file 12264_2022_888_MOESM1_ESM.pdf]

## Supplemental Materials

### Supplemental Table

**Table S1** Clinical characteristics of patients with TLE and controls

| Case | Sex/Age<br>(years) | Duration<br>(years) | Preoperative AEDs<br>before surgery | Resection<br>side | Pathological<br>diagnosis |
|------|--------------------|---------------------|-------------------------------------|-------------------|---------------------------|
| C 1  | M/36               | 0                   | None                                | Right             | N                         |
| C 2  | M/29               | 0                   | None                                | Right             | N                         |
| C 3  | F/27               | 0                   | None                                | Left              | N                         |
| C 4  | M/25               | 0                   | None                                | Right             | N                         |
| C 5  | M/40               | 0                   | None                                | Left              | N                         |
| C 6  | F/34               | 0                   | None                                | Left              | N                         |
| C 7  | F/23               | 0                   | None                                | Left              | N                         |
| E 1  | M/36               | 27                  | VPA, CBZ, CZP                       | Left              | NL, G                     |
| E 2  | F/26               | 7                   | CBZ, VPA, TPM, OXC                  | Left              | G                         |
| E 3  | M/29               | 14                  | CBZ, PB, LTG, LEV                   | Right             | NL, G                     |
| E 4  | F/38               | 18                  | VPA, PB, CBZ, LTG                   | Left              | G                         |
| E 5  | M/24               | 13                  | CBZ, PHT, VPA, PB                   | Right             | G                         |
| E 6  | F/28               | 8                   | VPA, CBZ, TPM, PB                   | Left              | NL, G                     |
| E 7  | F/23               | 6                   | TPM, CBZ, VPA                       | Right             | G                         |

AEDs, antiepileptic drugs; C, control; CBZ, carbamazepine; CZP, clonazepam; E, epilepsy; F, female; G, gliosis; GBP, gabapentin; LEV, levetiracetam; LTG, lamotrigine; M, male; N, normal; NL, neuron loss; OXC, oxcarbazepine; PB, phenobarbital; PHT, phenytoin; TPM, topiramate; VPA, valproate.

## Supplemental Figures

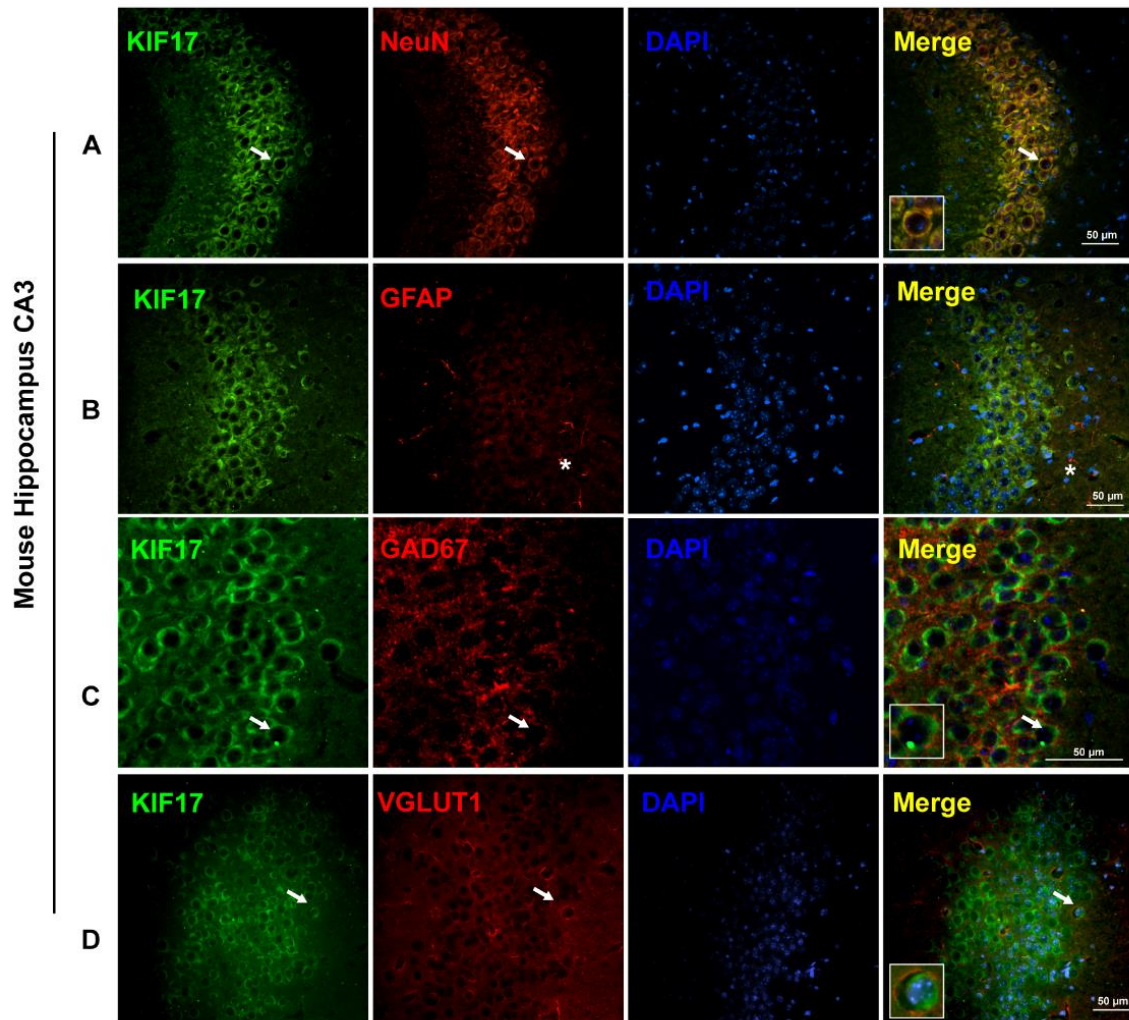

**Fig. S1** Localization of KIF17 in control mouse brain. **A, B** In the mouse hippocampus CA3, KIF17 co-localizes with NeuN and rarely with GFAP (\*astrocyte). **C, D** KIF17 co-localizes with a GABAergic neuronal marker (GAD67) and a glutamatergic neuronal marker (VGLUT1). Scale bars, 50 μm (arrow indicates positive cell).

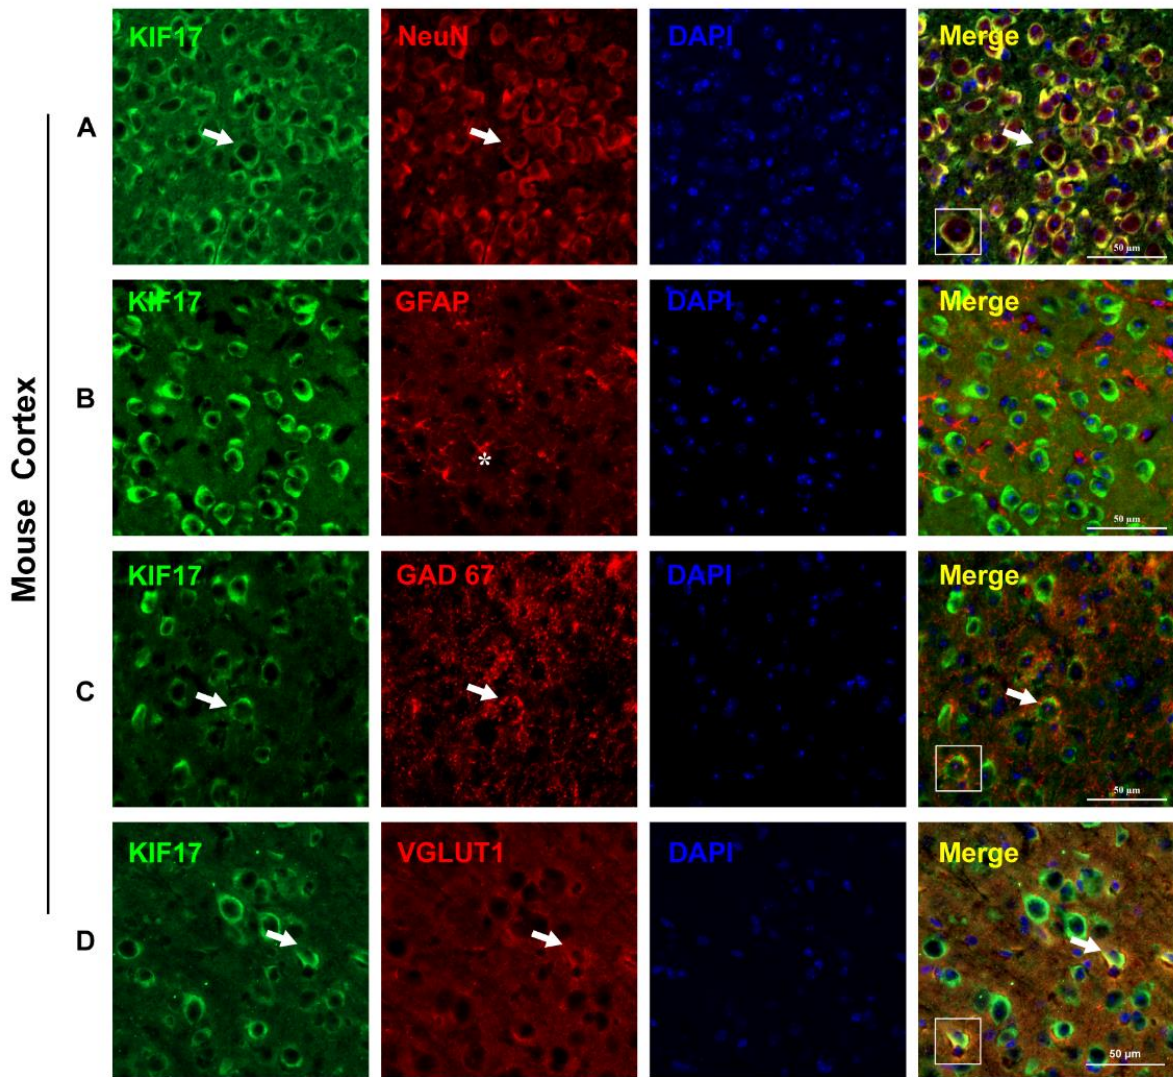

**Fig. S2** Localization of KIF17 in epileptic mouse brain. **A, B** In the cortex, KIF17 co-localizes with NeuN and rarely with GFAP (\*astrocytes). **C, D** KIF17 co-localizes with a GABAergic neuronal marker (GAD67) and a glutamatergic neuronal marker (VGLUT1). Scale bars, 50  $\mu\text{m}$  (arrow indicates positive cell).

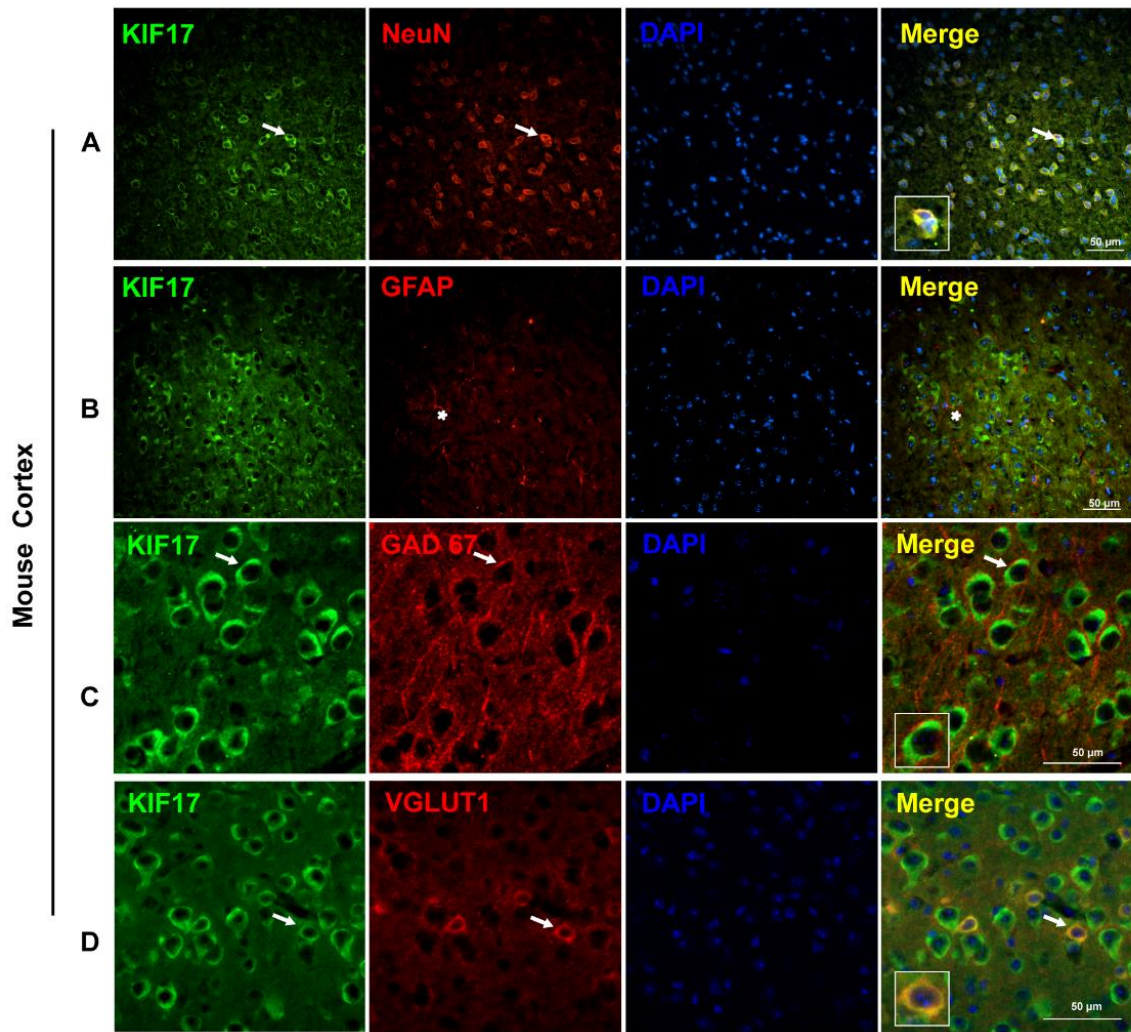

**Fig. S3** Localization of KIF17 in control mouse brain. **A, B** In the cortex, KIF17 co-localizes with NeuN and rarely with GFAP (\*astrocyte). **C, D** KIF17 co-localizes with a GABAergic neuronal marker (GAD67) and a glutamatergic neuronal marker (VGLUT1). Scale bars, 50 μm (arrow indicates positive cell).

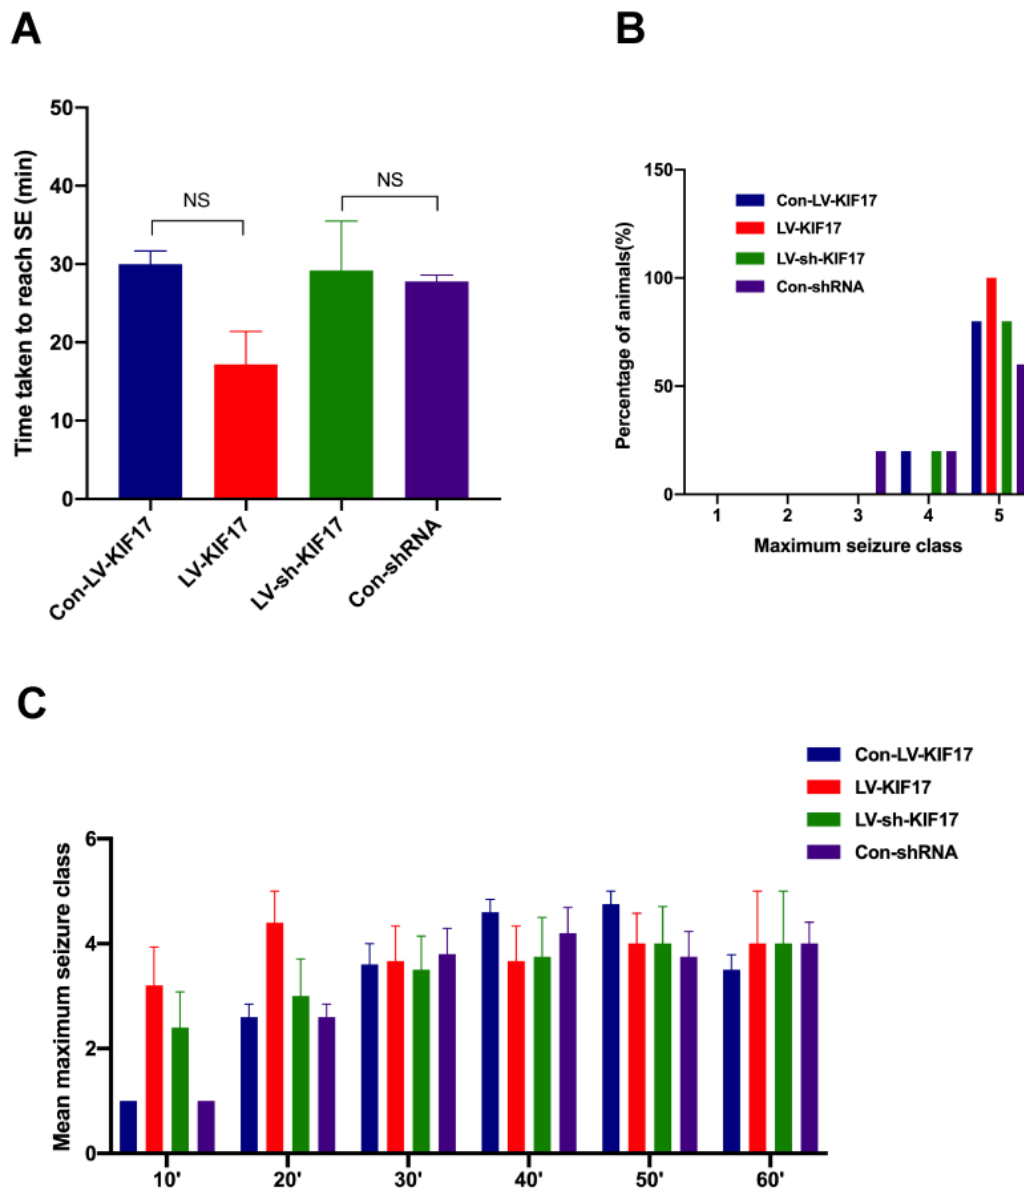

**Fig. S4** KIF17 modulates seizure susceptibility. Time taken to reach SE (A), percentage of maximum seizure class within 1 h (B), and seizure progression (C) after KA administration in the four groups ( $n = 5$ ). Data are presented as the mean  $\pm$  SEM, NS means  $P > 0.05$ , one-way ANOVA followed by LSD- $t$  test (A and C).

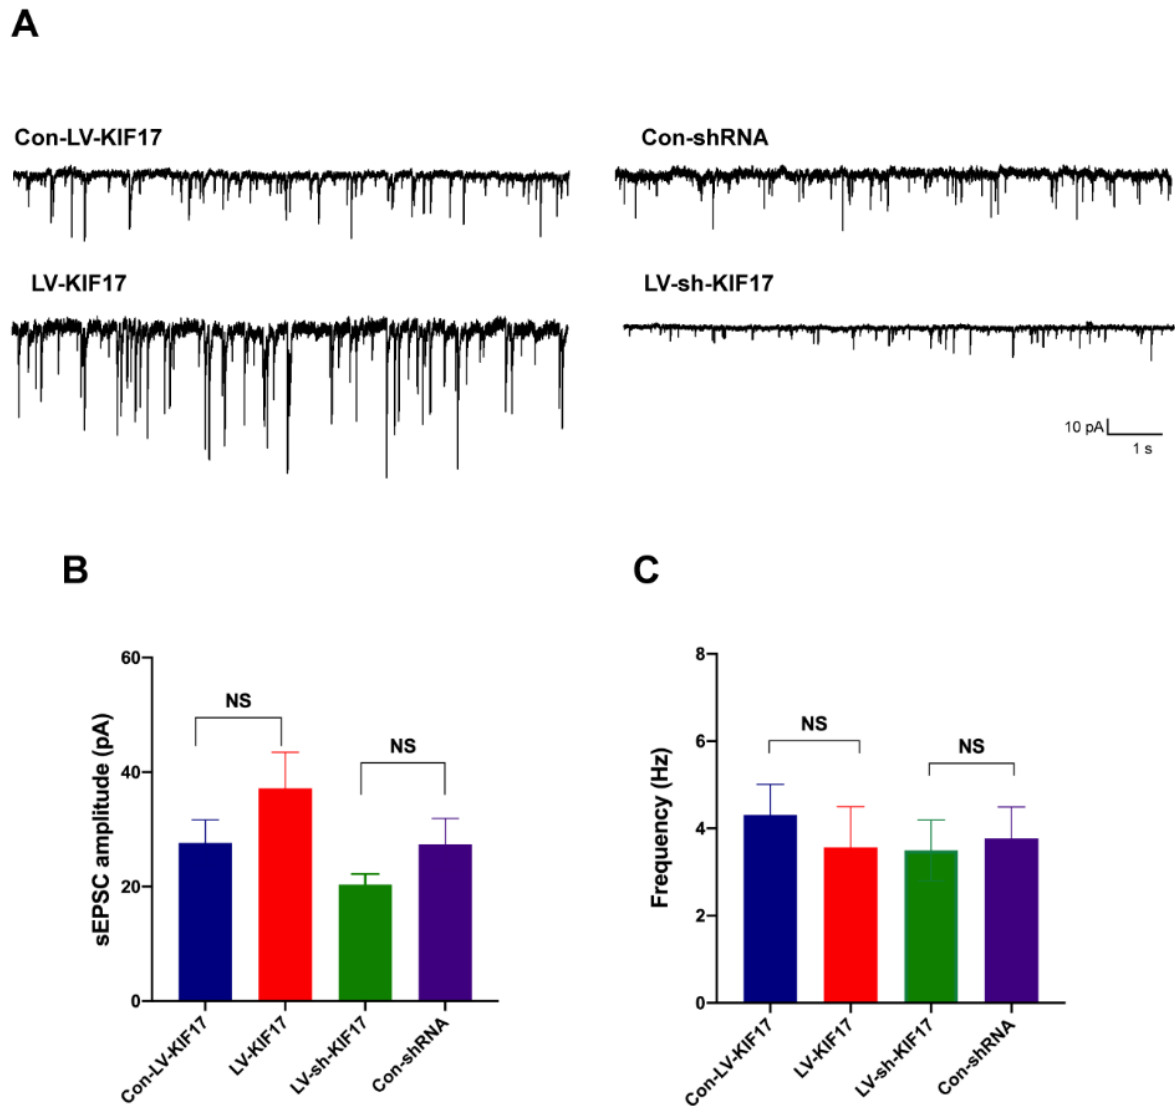

**Fig. S5** KIF17 alters the amplitude of sEPSCs. **A–C** Representative traces of sEPSCs (**A**) and amplitude and their frequency (**B** and **C**) ( $n = 5$ ). Data are presented as the mean  $\pm$  SEM, NS means  $P > 0.05$ , one-way ANOVA followed by LSD- $t$  test.

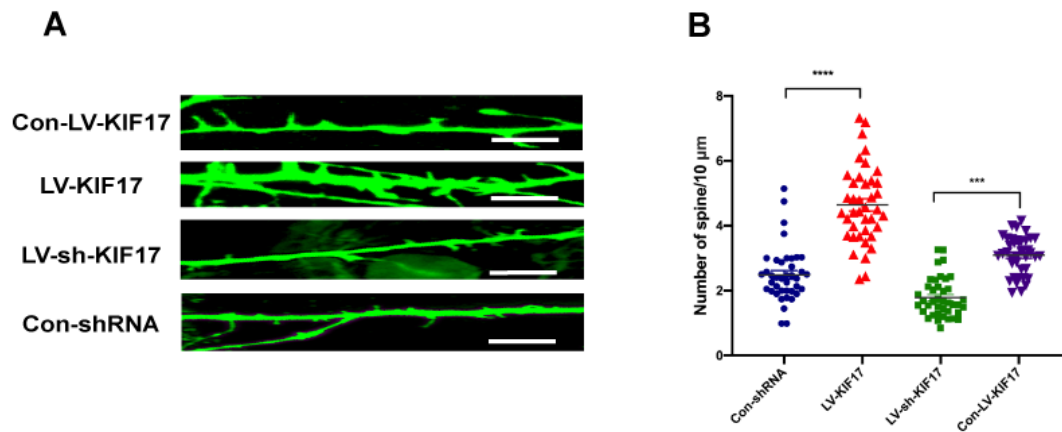

**Fig. S6** KIF17 regulates spine density. **A** Representative images of spine density on cultured primary neurons after treatment with Con-LV-KIF17, LV-KIF17, LV-sh-KIF17, or Con-shRNA. Scale bars, 10  $\mu\text{m}$ . **B** Statistics of spine density ( $n = 50$ ). Data are presented as the mean  $\pm$  SEM, \*\*\* $P < 0.0005$ , \*\*\*\* $P < 0.0001$ , one-way ANOVA followed by LSD- $t$  test.

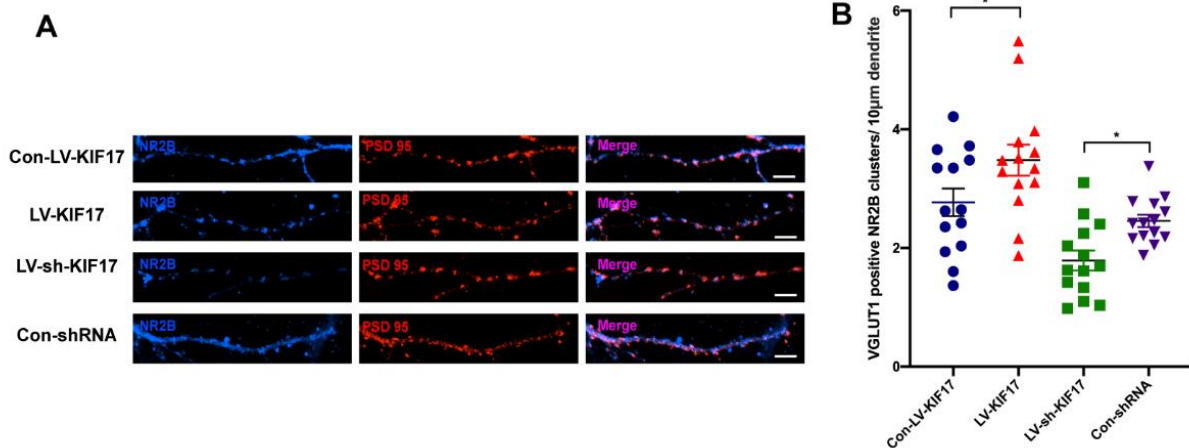

**Fig. S7** KIF17 intervention changes the surface expression of NR2B on hippocampal neurons. **A** Representative images showing the co-localization of NR2B and PSD95 in hippocampal neuronal dendrites after KIF17 intervention. Scale bars, 10  $\mu\text{m}$ . **B** Statistics for the PSD95-positive NR2B cluster in each treatment group. Data are presented as the mean  $\pm$  SEM,  $n = 14$ , \* $P < 0.05$ , one-way ANOVA followed by LSD- $t$  test.
